# Supplementary material for: Mixed Psyllium Fiber Improves the Quality, Nutritional Value, Polyphenols and Antioxidant Activity of Rye Bread
Source: MDPI journal article supplement (doi:10.3390/foods12193534), 2023-09-22
Supplement: s1 [file s1]

**Table S1.** Significant Pearson's correlation coefficients (significance level  $\alpha \leq 0,05$ )

|                 | Ash           | TDF           | Hardness      | Cohesiveness  | Springiness   | Gumminess     | Chewiness     | L* crust      | a* crust      | b* crust      | L* crumb      | a* crumb      | b* crumb      | overbake      | specific volume | crumb porosity | total protein | ABTS          | FRAP          | TPC           |
|-----------------|---------------|---------------|---------------|---------------|---------------|---------------|---------------|---------------|---------------|---------------|---------------|---------------|---------------|---------------|-----------------|----------------|---------------|---------------|---------------|---------------|
| Ash             |               | <b>0,980</b>  | 0,053         | -0,446        | <b>-0,505</b> | -0,218        | -0,442        | <b>-0,716</b> | <b>-0,902</b> | <b>-0,836</b> | <b>-0,859</b> | <b>0,520</b>  | <b>-0,850</b> | <b>0,535</b>  | -0,316          | 0,331          | <b>0,689</b>  | <b>0,827</b>  | <b>0,848</b>  | 0,351         |
| TDF             | <b>0,980</b>  |               | 0,020         | -0,488        | <b>-0,546</b> | -0,296        | <b>-0,536</b> | <b>-0,752</b> | <b>-0,886</b> | <b>-0,840</b> | <b>-0,868</b> | <b>0,521</b>  | <b>-0,828</b> | <b>0,574</b>  | -0,288          | 0,335          | <b>0,730</b>  | <b>0,823</b>  | <b>0,900</b>  | 0,246         |
| Hardness        | 0,053         | 0,020         |               | <b>-0,669</b> | <b>-0,619</b> | <b>0,799</b>  | 0,440         | 0,146         | 0,149         | -0,121        | 0,132         | -0,281        | 0,190         | -0,346        | <b>-0,729</b>   | <b>0,610</b>   | 0,308         | 0,199         | 0,228         | 0,041         |
| Cohesiveness    | -0,446        | -0,488        | <b>-0,669</b> |               | <b>0,936</b>  | -0,204        | 0,262         | 0,387         | 0,337         | <b>0,573</b>  | 0,241         | 0,062         | 0,066         | -0,038        | 0,488           | <b>-0,505</b>  | <b>-0,837</b> | -0,300        | <b>-0,668</b> | 0,267         |
| Springiness     | <b>-0,505</b> | <b>-0,546</b> | <b>-0,619</b> | <b>0,936</b>  |               | -0,144        | 0,362         | 0,455         | 0,376         | <b>0,665</b>  | 0,345         | -0,095        | 0,075         | -0,120        | <b>0,531</b>    | <b>-0,671</b>  | <b>-0,874</b> | -0,376        | <b>-0,757</b> | 0,238         |
| Gumminess       | -0,218        | -0,296        | <b>0,799</b>  | -0,204        | -0,144        |               | <b>0,868</b>  | <b>0,524</b>  | 0,424         | 0,251         | 0,333         | -0,301        | 0,248         | <b>-0,595</b> | <b>-0,648</b>   | 0,407          | -0,178        | 0,044         | -0,218        | 0,409         |
| Chewiness       | -0,442        | <b>-0,536</b> | 0,440         | 0,262         | 0,362         | <b>0,868</b>  |               | <b>0,732</b>  | <b>0,579</b>  | <b>0,572</b>  | 0,493         | -0,349        | 0,257         | <b>-0,638</b> | -0,341          | 0,026          | <b>-0,595</b> | -0,146        | <b>-0,580</b> | <b>0,517</b>  |
| L* crust        | <b>-0,716</b> | <b>-0,752</b> | 0,146         | 0,387         | 0,455         | <b>0,524</b>  | <b>0,732</b>  |               | <b>0,868</b>  | <b>0,884</b>  | <b>0,669</b>  | -0,357        | <b>0,523</b>  | <b>-0,689</b> | -0,121          | -0,210         | <b>-0,748</b> | <b>-0,511</b> | <b>-0,752</b> | 0,137         |
| a* crust        | <b>-0,902</b> | <b>-0,886</b> | 0,149         | 0,337         | 0,376         | 0,424         | <b>0,579</b>  | <b>0,868</b>  |               | <b>0,874</b>  | <b>0,814</b>  | <b>-0,526</b> | <b>0,800</b>  | <b>-0,612</b> | -0,032          | -0,081         | <b>-0,701</b> | <b>-0,649</b> | <b>-0,734</b> | -0,189        |
| b* crust        | <b>-0,836</b> | <b>-0,840</b> | -0,121        | <b>0,573</b>  | <b>0,665</b>  | 0,251         | <b>0,572</b>  | <b>0,884</b>  | <b>0,874</b>  |               | <b>0,736</b>  | -0,443        | <b>0,568</b>  | -0,434        | 0,146           | -0,375         | <b>-0,858</b> | <b>-0,626</b> | <b>-0,799</b> | -0,092        |
| L* crumb        | <b>-0,859</b> | <b>-0,868</b> | 0,132         | 0,241         | 0,345         | 0,333         | 0,493         | <b>0,669</b>  | <b>0,814</b>  | <b>0,736</b>  |               | <b>-0,834</b> | <b>0,881</b>  | <b>-0,611</b> | 0,253           | -0,223         | -0,494        | <b>-0,769</b> | <b>-0,729</b> | -0,329        |
| a* crumb        | <b>0,520</b>  | <b>0,521</b>  | -0,281        | 0,062         | -0,095        | -0,301        | -0,349        | -0,357        | <b>-0,526</b> | -0,443        | <b>-0,834</b> |               | <b>-0,656</b> | 0,319         | -0,049          | 0,042          | 0,204         | 0,477         | 0,343         | 0,314         |
| b* crumb        | <b>-0,850</b> | <b>-0,828</b> | 0,190         | 0,066         | 0,075         | 0,248         | 0,257         | <b>0,523</b>  | <b>0,800</b>  | <b>0,568</b>  | <b>0,881</b>  | <b>-0,656</b> |               | <b>-0,552</b> | 0,185           | 0,005          | -0,292        | <b>-0,763</b> | <b>-0,572</b> | <b>-0,555</b> |
| Overbake        | <b>0,535</b>  | <b>0,574</b>  | -0,346        | -0,038        | -0,120        | <b>-0,595</b> | <b>-0,638</b> | <b>-0,689</b> | <b>-0,612</b> | -0,434        | <b>-0,611</b> | 0,319         | <b>-0,552</b> |               | -0,004          | 0,115          | 0,298         | 0,411         | <b>0,613</b>  | -0,135        |
| Specific volume | -0,316        | -0,288        | <b>-0,729</b> | 0,488         | <b>0,531</b>  | <b>-0,648</b> | -0,341        | -0,121        | -0,032        | 0,146         | 0,253         | -0,049        | 0,185         | -0,004        |                 | <b>-0,754</b>  | -0,174        | <b>-0,501</b> | -0,430        | -0,373        |
| Crumb porosity  | 0,331         | 0,335         | <b>0,610</b>  | <b>-0,505</b> | <b>-0,671</b> | 0,407         | 0,026         | -0,210        | -0,081        | -0,375        | -0,223        | 0,042         | 0,005         | 0,115         | <b>-0,754</b>   |                | 0,426         | 0,476         | <b>0,576</b>  | 0,104         |
| Total protein   | <b>0,689</b>  | <b>0,730</b>  | 0,308         | <b>-0,837</b> | <b>-0,874</b> | -0,178        | <b>-0,595</b> | <b>-0,748</b> | <b>-0,701</b> | <b>-0,858</b> | -0,494        | 0,204         | -0,292        | 0,298         | -0,174          | 0,426          |               | 0,451         | <b>0,822</b>  | -0,245        |
| ABTS            | <b>0,827</b>  | <b>0,823</b>  | 0,199         | -0,300        | -0,376        | 0,044         | -0,146        | <b>-0,511</b> | <b>-0,649</b> | <b>-0,626</b> | <b>-0,769</b> | 0,477         | <b>-0,763</b> | 0,411         | <b>-0,501</b>   | 0,476          | 0,451         |               | <b>0,770</b>  | 0,452         |
| FRAP            | <b>0,848</b>  | <b>0,900</b>  | 0,228         | <b>-0,668</b> | <b>-0,757</b> | -0,218        | <b>-0,580</b> | <b>-0,752</b> | <b>-0,734</b> | <b>-0,799</b> | <b>-0,729</b> | 0,343         | <b>-0,572</b> | <b>0,613</b>  | -0,430          | <b>0,576</b>   | <b>0,822</b>  | <b>0,770</b>  |               | -0,037        |
| TPC             | 0,351         | 0,246         | 0,041         | 0,267         | 0,238         | 0,409         | <b>0,517</b>  | 0,137         | -0,189        | -0,092        | -0,329        | 0,314         | <b>-0,555</b> | -0,135        | -0,373          | 0,104          | -0,245        | 0,452         | -0,037        |               |
