# Supplementary material for: Mixed Psyllium Fiber Improves the Quality, Nutritional Value, Polyphenols and Antioxidant Activity of Rye Bread
Source: MDPI journal article supplement (doi:10.3390/foods12193534), 2023-09-22
Supplement: s1 [file s1]

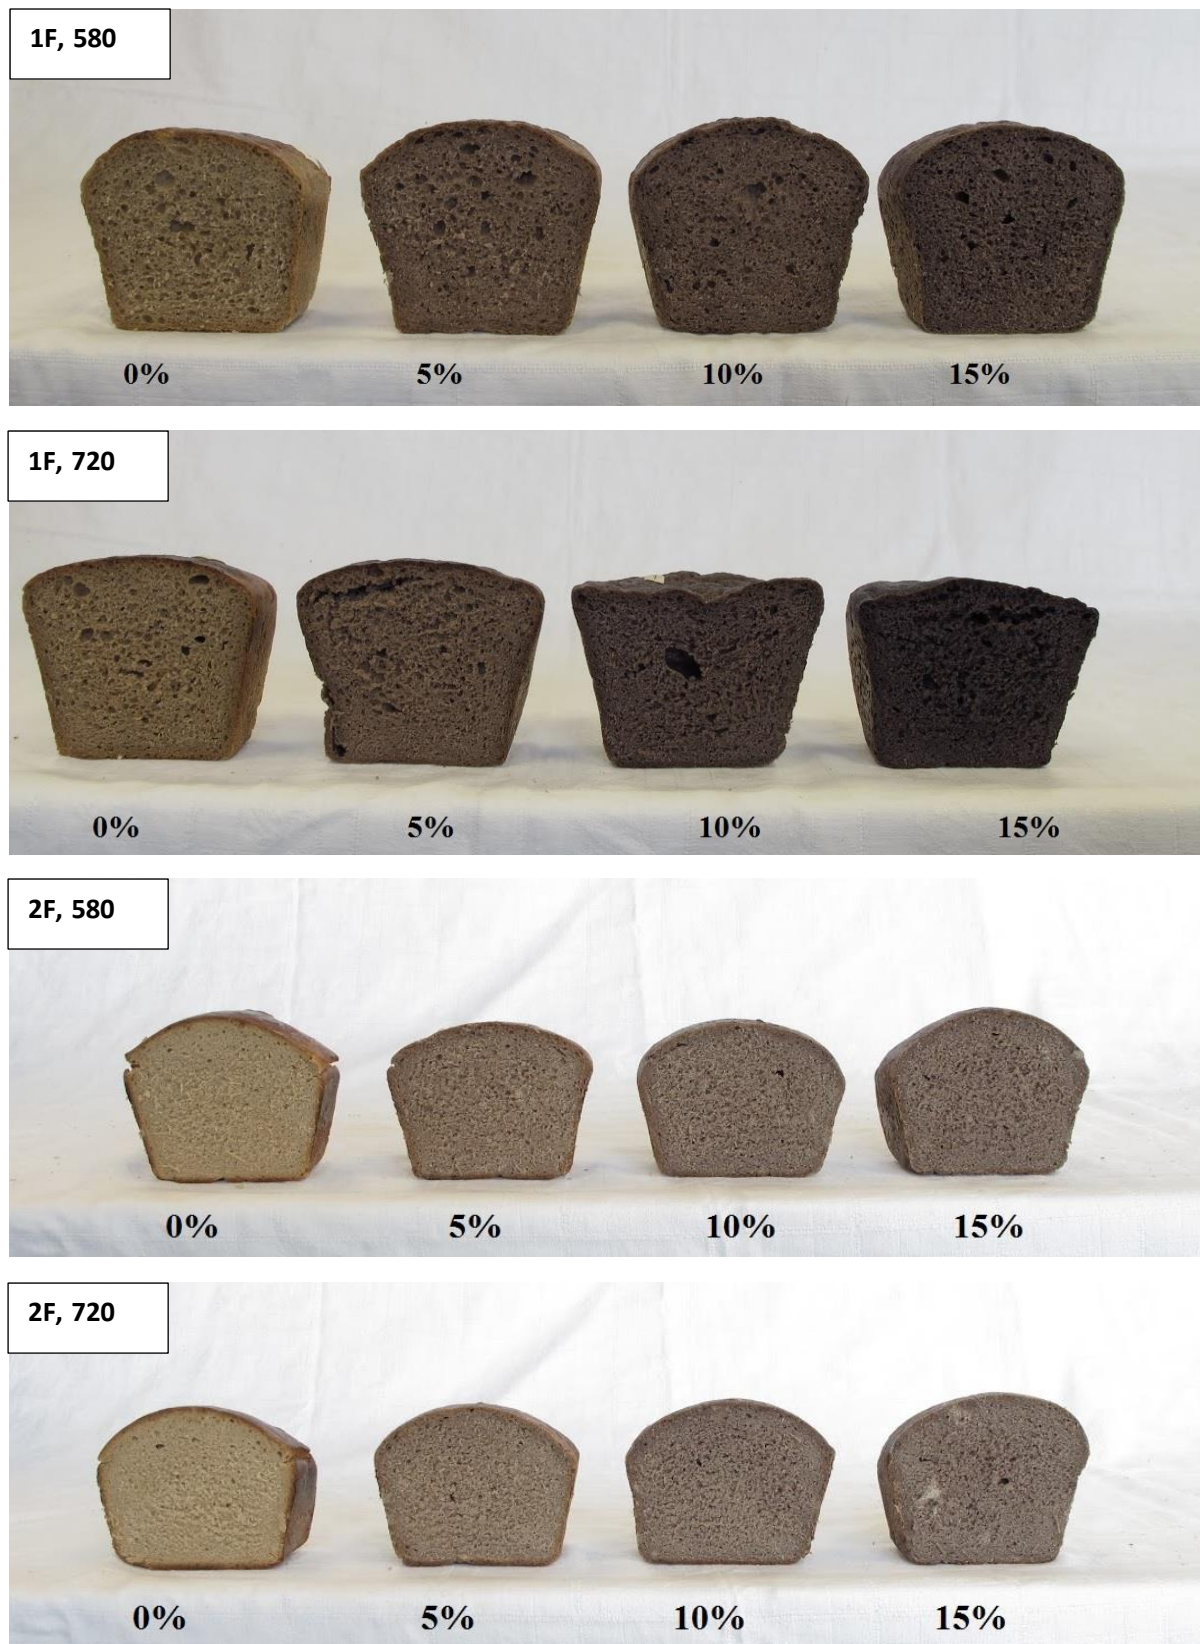

**Figure S1.** Photo of the crumb of bread baked with the single-phase (1F) and two-phase (2F) method with RF type 580 and 720 with different level of PF (0%, 5%, 10%, 15%).
